# Supplementary material for: Facilely synthesized pH-responsive fluorescent polymer dots entrapping doped and coupled doxorubicin for nucleus-targeted chemotherapy
Source: Royal Society of Chemistry journal article supplement (doi:10.1039/c7tb00394c), 2017-01-01
Supplement: c7tb00394c1.pdf [file c7tb00394c1.pdf]

## Supporting Information

### Facilely Synthesized pH-Responsive Fluorescent Polymer Dots Entrapping Doped-Coupled Doxorubicin for Nucleus-Targeted Chemotherapy

Yixiao Guo<sup>a</sup>, Fengwen Cao<sup>a</sup>, Yao Li<sup>a</sup> and Liqin Xiong<sup>\*a,b</sup>

<sup>a</sup> Shanghai Med-X Engineering Research Center, School of Biomedical Engineering,

Shanghai Jiao Tong University, Shanghai 200030, P. R. China

<sup>b</sup> Department of Nuclear Medicine, Rui Jin Hospital, School of Medicine,

Shanghai Jiao Tong University, Shanghai, 200025, P. R. China. E-mail:

xiongliqin@sjtu.edu.cn

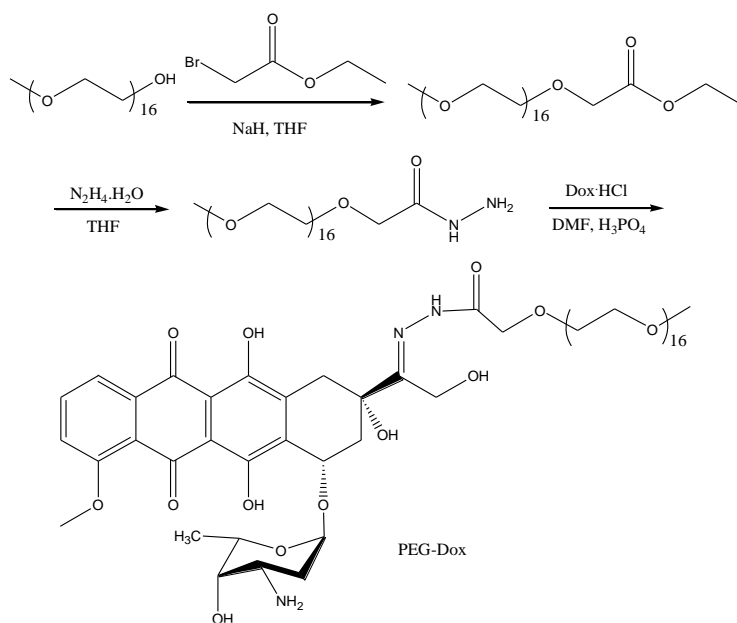

**Scheme S1.** Synthesis of PEG-Dox.

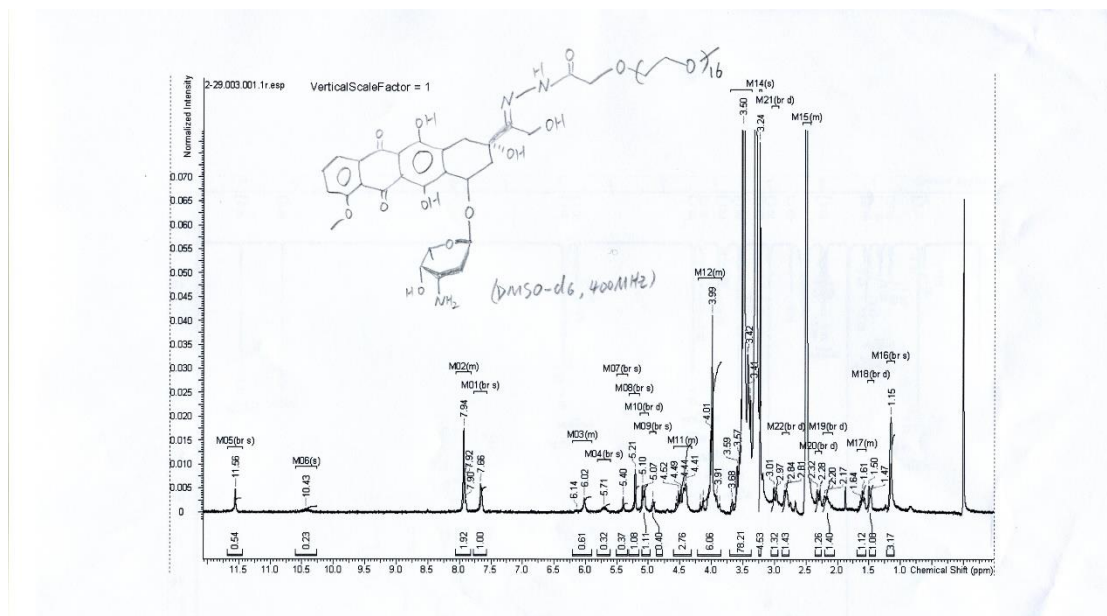

**Fig. S1.**  $^1\text{H}$  NMR spectrum of PEG-Dox.

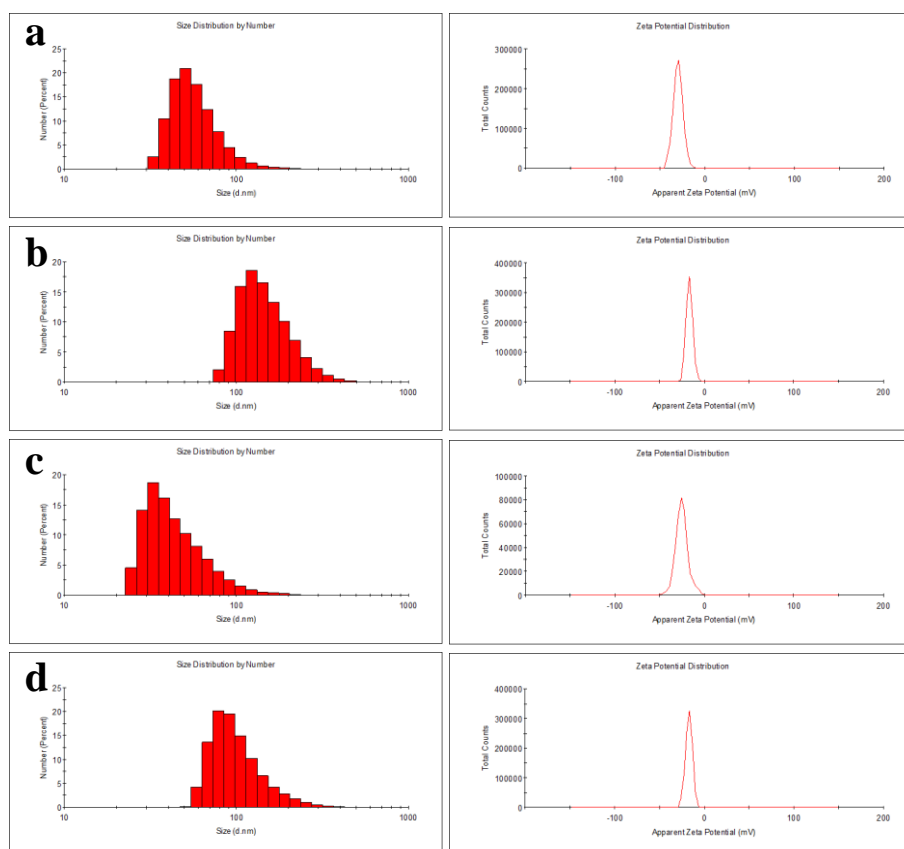

**Fig. S2.** DLS and Zeta potential distribution of different polymer dots measured in low concentration Hepes. (a) PFBT polymer dots. (b) Dox coupled PFBT polymer dots. (c) PEG-Dox doped PFBT polymer dots. (d) PEG-Dox doped&coupled PFBT polymer dots.

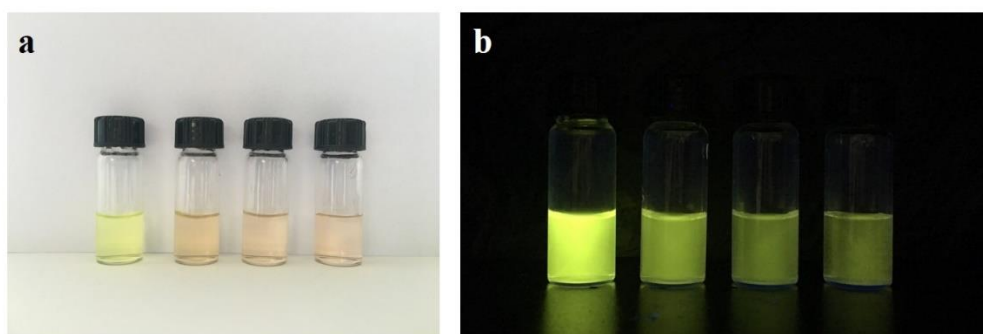

**Fig. S3.** Different polymer dots samples in (a) Room lights (b) UV lights (365nm excitation). From left to right: PFBT polymer dots, PEG-Dox doped polymer dots, Dox coupled polymer dots and PEG-Dox doped&coupled polymer dots.

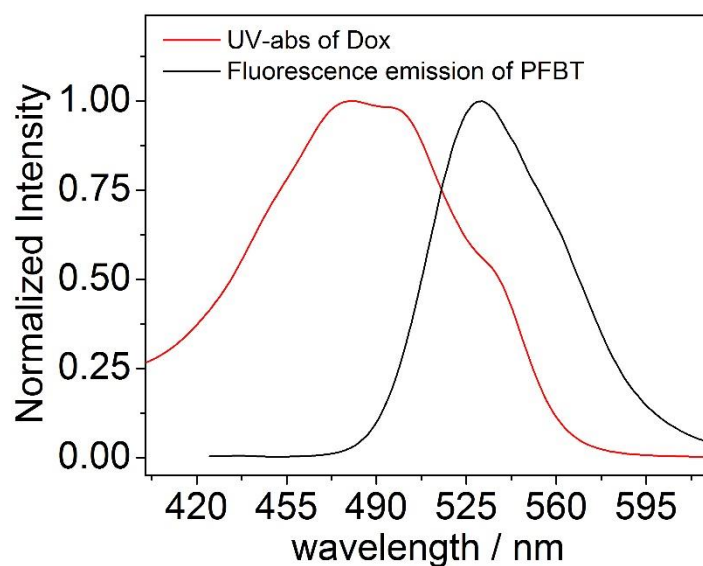

**Fig. S4.** Fluorescence emission spectrum of PFBT and UV-Vis absorption spectrum of Dox.

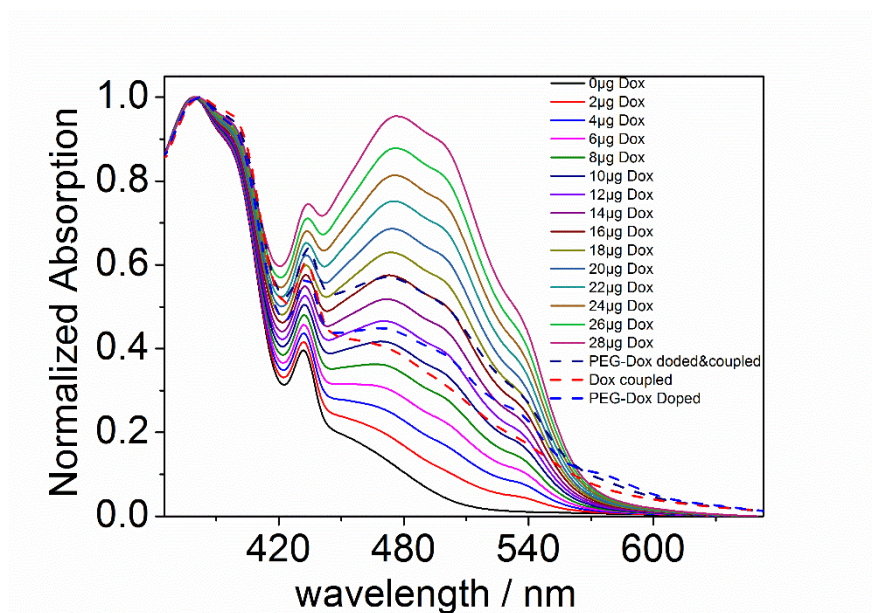

**Fig. S5.** Drug loading evaluation of three different Dox functionalized PFBT polymer dots.

|                                         | UV 488  | FL 488EX | QY    |
|-----------------------------------------|---------|----------|-------|
| Free Dox                                | 0.04191 | 285.058  | 0.048 |
| PFBT (47000) polymer dots               | 0.01497 | 1295.530 | 0.605 |
| Dox coupled PFBT polymer dots           | 0.05457 | 875.156  | 0.112 |
| PEG-Dox doped PFBT polymer dots         | 0.04405 | 651.006  | 0.103 |
| PEG-Dox doped&coupled PFBT polymer dots | 0.03609 | 468.684  | 0.091 |
| Rhodamine-6G                            | 0.024   | 3090.614 | 0.94  |

**Table S1.** Fluorescence Quantum Yield value. Rhodamine6G was used as a standard with a fluorescence quantum yield of 0.94.

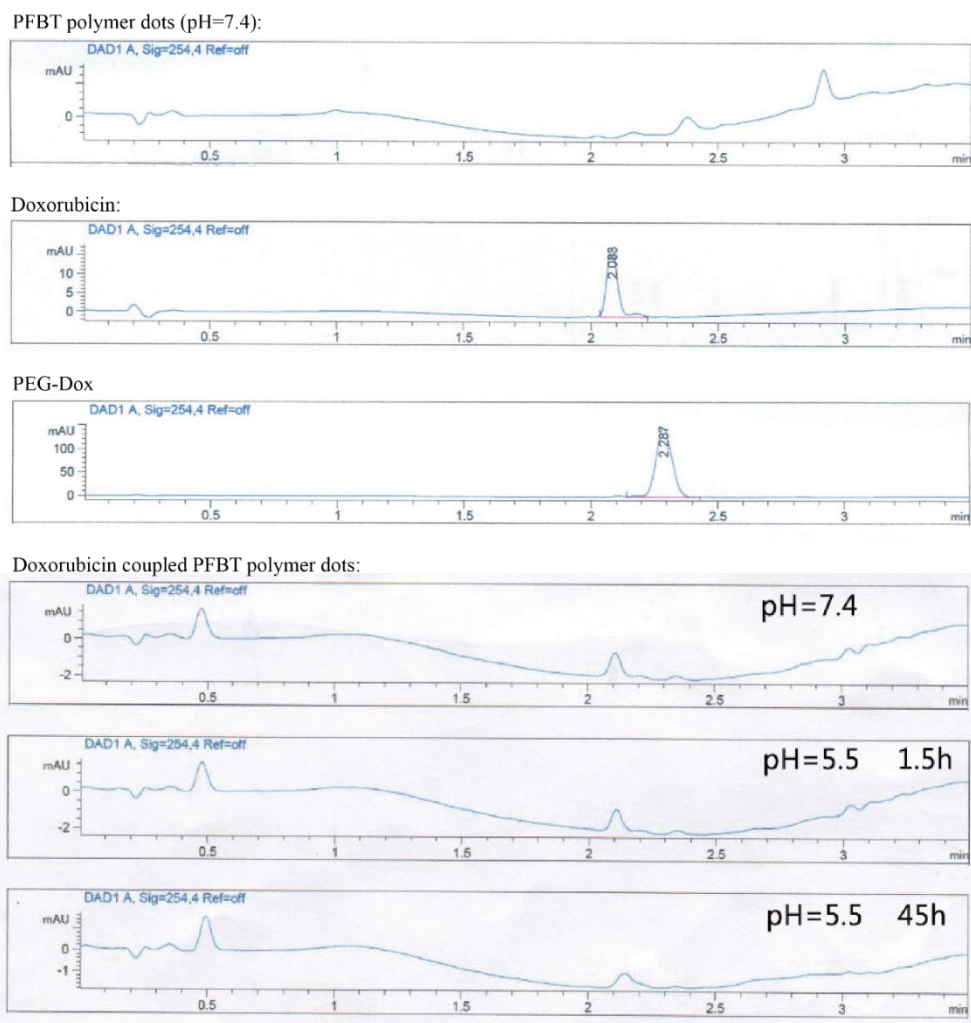

**Fig. S6.** High performance liquid chromatography (HPLC) spectra of PFBT polymer dots, Dox, PEG-Dox and Dox coupled PFBT polymer dots.

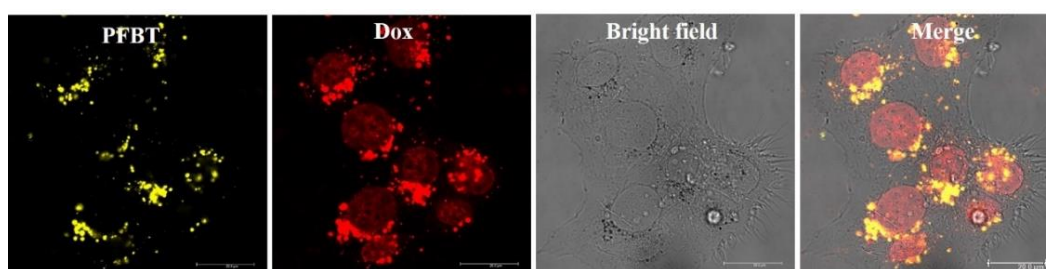

**Fig. S7.** CLSM of PFBT polymer dots and Dox solution mixture during 24h. PFBT polymer dots were applied with  $10\mu\text{g/mL}$ , and Dox were applied with  $3\text{m}\mu\text{g/mL}$ . PFBT polymer dots were collected from 450~530nm (EX: 405nm), and Dox was collected from 550~600nm (EX: 488nm). (Scale bar = $20\mu\text{m}$ ) Merge channel includes the channel of the Dox, PFBT and the bright field.

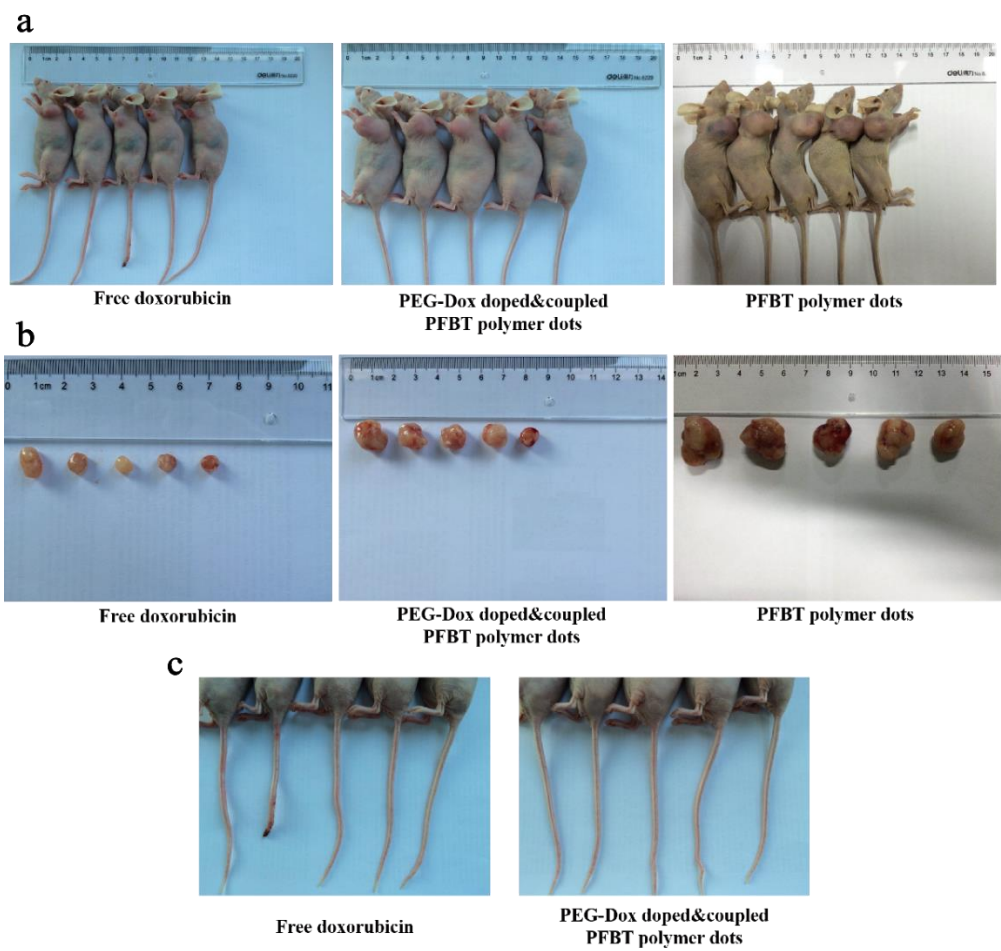

**Fig. S8** (a) Picture of NCI-H292 tumor bearing mice (5 each group) after treatment. (b) Picture of tumor tissue collected after treatment. (c) Picture of mice tails after treatment.

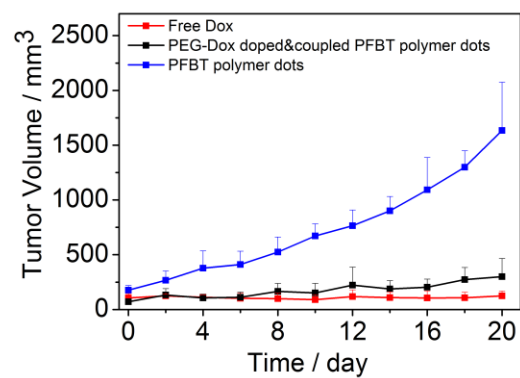

**Fig. S9.** Tumor volume record during 20 days. The tumor volume is the average volume of the total 5 mice tumor volume of each group.

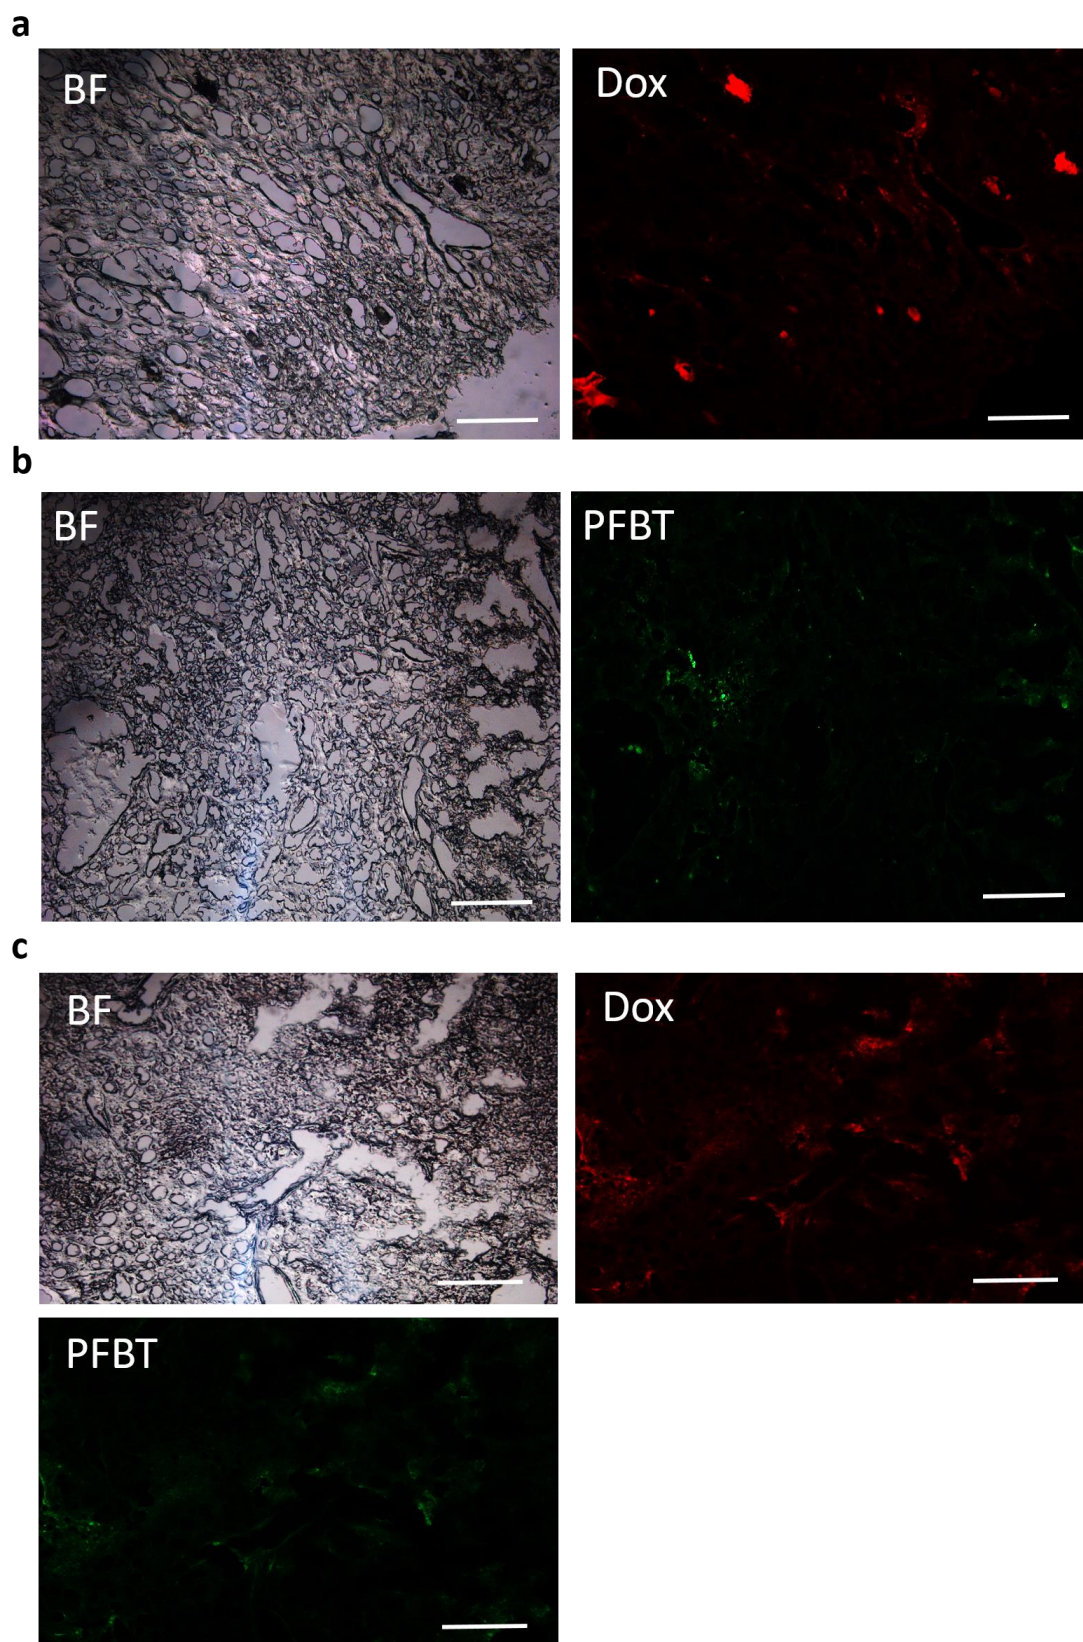

**Fig. S10.** Fluorescence imaging of tumor tissue in (a) free Dox group. (b) PFBT polymer dots group. (c) PEG-Dox doped&coupled polymer dots group. (Scale bar: 100 $\mu$ m)
